# Supplementary material for: Structuring Circular Objectives and Design Strategies for the Circular Economy: A Multi-Hierarchical Theoretical Framework
Source: MDPI journal article supplement (doi:10.3390/su14159298), 2022-07-29
Supplement: s1 [file s1]

## Supplementary Materials

This supplemental material should not be interpreted as a compilation of strategies defined by various authors but rather as an illustration of how the authors classify information using various hierarchical structures. Thus, X1 represents the highest level of information, whereas X2 and X3 are subclasses of information of X1. Tabs 1, 2, and 3 represent the various possible relationships, showing the many ways of interpreting and structuring information.

**Table S1. Classification of design strategies according to relevance in literature.**

This table classifies how authors organise design strategies according to relevance. The terms "Strategy X<sup>1</sup>", "Strategy X<sup>2</sup>" and "Strategy X<sup>3</sup>" denote how authors have categorised strategies according to their hierarchical importance.

| Authors             | Strategy X1                  | Strategy X2                                 | Strategy X3                                                                          |
|---------------------|------------------------------|---------------------------------------------|--------------------------------------------------------------------------------------|
| Bakker et al., 2014 | Prevention                   | Material efficiency                         |                                                                                      |
|                     |                              | Longer Product Life                         |                                                                                      |
|                     | Reuse                        | Product repair                              |                                                                                      |
|                     |                              | Product refurbishment                       |                                                                                      |
|                     |                              | Product Remanufacturing                     |                                                                                      |
|                     | Recycling                    | Product/material recycling                  |                                                                                      |
|                     |                              |                                             |                                                                                      |
| Arnette et al. 2014 | Design for Supply Chain      | Design for Procurement                      |                                                                                      |
|                     |                              | Design for Logistics                        |                                                                                      |
|                     |                              | Design for Manufacturing & Assembly         | Design for Manufacturing                                                             |
|                     |                              |                                             | Design for Assembly                                                                  |
|                     |                              |                                             | Design for Flexibility<br>- Design for Mass Customization<br>- Design for Modularity |
|                     |                              |                                             | Design for Quality<br>- Design for Reliability                                       |
|                     |                              | Design for Supportability                   | Design for Maintainability                                                           |
|                     |                              |                                             | Design for Serviceability                                                            |
|                     | Design for Supportability    |                                             |                                                                                      |
|                     | Design for Disassembly       |                                             |                                                                                      |
|                     | Design for Reverse Logistics |                                             |                                                                                      |
|                     | Design for Environment       | Design for Chronic Risk Reduction           |                                                                                      |
|                     |                              | Design for Energy Conservation              |                                                                                      |
|                     |                              | Design for Material Conservation            |                                                                                      |
|                     |                              | Design for Waste Minimization & Recovery    |                                                                                      |
|                     |                              | Design for Remanufacture, Reuse & Recycling | Design for Reuse                                                                     |
|                     |                              |                                             | Design for Remanufacture                                                             |

|                           |                                              |                                             |                                                                  |
|---------------------------|----------------------------------------------|---------------------------------------------|------------------------------------------------------------------|
|                           |                                              |                                             | Design for Recycling                                             |
|                           | Design for Social Responsibility             |                                             |                                                                  |
| Brennan et al., 2015      | Reduce                                       | Durability/Up-weighting                     |                                                                  |
|                           |                                              | Light-weighting                             |                                                                  |
|                           |                                              | Fewer hazardous materials                   |                                                                  |
|                           |                                              | changing consumption patterns               |                                                                  |
|                           | Re-use                                       | Cleaning                                    |                                                                  |
|                           |                                              | Maintaining                                 |                                                                  |
|                           |                                              | Repairing                                   |                                                                  |
|                           |                                              | Remanufacturing/refurbishing/reconditioning |                                                                  |
|                           | Recycle                                      | Upcycle                                     |                                                                  |
|                           |                                              | Down-cycle                                  |                                                                  |
|                           |                                              | Compost                                     |                                                                  |
|                           | Recovery                                     | AD                                          |                                                                  |
|                           |                                              | incineration/gasification/pyrolysis         |                                                                  |
| Van den Berg et al., 2015 | Future proof design (last long and use long) | Long Lasting                                | Performance                                                      |
|                           |                                              |                                             | Reliability                                                      |
|                           |                                              |                                             | Durability                                                       |
|                           |                                              | Long in Use                                 | Roadmap fit                                                      |
|                           |                                              |                                             | Upgradability                                                    |
|                           |                                              |                                             | Adaptability                                                     |
|                           |                                              |                                             | Timeless Design                                                  |
|                           |                                              |                                             | Anticipate Legislation                                           |
|                           | Disassembly (non-destructive)                | Connections                                 | Quick and easy disconnect                                        |
|                           |                                              |                                             | Limit use and diversity of fasteners                             |
|                           |                                              |                                             | Limit use and diversity of tools                                 |
|                           |                                              | Product Architecture                        | Simply Product Architecture                                      |
|                           |                                              |                                             | Ease of access to components                                     |
|                           |                                              |                                             | Clarity of Disassembly sequence                                  |
|                           | Maintenance (Reuse of the product)           | Maintenance                                 | Ease of cleaning                                                 |
|                           |                                              |                                             | Ease of Repair                                                   |
|                           |                                              |                                             | Allow-on-site maintenance                                        |
|                           |                                              | Lifetime prognostics                        | (Online) monitoring for quality, testing maintenance and billing |
|                           | Remake (Reuse of the components)             | Modularity                                  | Use modular components                                           |

|                                   |                                   |                                       |                                       |                               |
|-----------------------------------|-----------------------------------|---------------------------------------|---------------------------------------|-------------------------------|
|                                   |                                   |                                       | Use standard interfaces               |                               |
|                                   |                                   |                                       | Back & forwards compatibility         |                               |
|                                   |                                   | Reliability assessment                | Allow for easy testing of components  |                               |
|                                   |                                   | (Reverse) logistics                   | Product can be returned               |                               |
|                                   |                                   |                                       | Allow for spare part harvesting       |                               |
|                                   |                                   |                                       | Local production                      |                               |
|                                   | Recycling (Reuse of materials)    | Materials                             | Use preferred/pure materials          |                               |
|                                   |                                   |                                       | Allow material separability           |                               |
|                                   |                                   | Electronic                            | Get PBC out in one piece              |                               |
|                                   |                                   |                                       | Easy/fast detection of materials      |                               |
| Use SMD components                |                                   |                                       |                                       |                               |
| De los Rios et al., 2016          | Whole Systems Design              | Radical innovation for sustainability |                                       |                               |
|                                   |                                   | Reduced environmental backpacks       | Design for Supply Chain               |                               |
|                                   | Design for Environment            |                                       | Design for Manufacturing and Assembly |                               |
|                                   |                                   | Clean energy consumption              | Biomimicry                            |                               |
|                                   |                                   | Material selection for sustainability |                                       |                               |
|                                   | Design for Life Cycle             | Design for Reliability                | Design for Quality                    |                               |
|                                   |                                   | Design for Maintenance                | Design for Repair / Refurbishment     |                               |
|                                   |                                   | Design for Reuse                      |                                       | Design for Upgrading          |
|                                   |                                   | Design for Component Recovery         | Design for Remanufacturing            |                               |
|                                   |                                   | Design for Material Recovery          | Design for Recycling                  |                               |
|                                   |                                   |                                       | Design for Cascaded Use               |                               |
|                                   |                                   | Bocken et al., 2016                   | Design for Slowing Resource Loops     | Design for long-life products |
|                                   | Design for product-life extension |                                       |                                       |                               |
| Design for Closing Resource Loops | Design for technical cycle        |                                       |                                       |                               |
|                                   | Design for biological cycle       |                                       |                                       |                               |
|                                   | Design for dis- and reassembling  |                                       |                                       |                               |
| Business Models for Slowing Loops | Accessing and performance model   |                                       |                                       |                               |
|                                   | Extending product values          |                                       |                                       |                               |
|                                   | Classic long life                 |                                       |                                       |                               |
|                                   | Encouraging sufficiency           |                                       |                                       |                               |

|                                                                                                                                                              |                                   |                                                                                                                                                                                                                                                                                                                             |                                                                                                                                                                                                                                                                                                                                                                            |
|--------------------------------------------------------------------------------------------------------------------------------------------------------------|-----------------------------------|-----------------------------------------------------------------------------------------------------------------------------------------------------------------------------------------------------------------------------------------------------------------------------------------------------------------------------|----------------------------------------------------------------------------------------------------------------------------------------------------------------------------------------------------------------------------------------------------------------------------------------------------------------------------------------------------------------------------|
|                                                                                                                                                              | Business Models for Closing Loops | Extending resource value                                                                                                                                                                                                                                                                                                    |                                                                                                                                                                                                                                                                                                                                                                            |
|                                                                                                                                                              |                                   | Industrial Symbiosis                                                                                                                                                                                                                                                                                                        |                                                                                                                                                                                                                                                                                                                                                                            |
| Moreno et al., 2016                                                                                                                                          | Design for resource conservation  | Design for circular supplies                                                                                                                                                                                                                                                                                                | Design for closing resource loops <ul style="list-style-type: none"><li>- Design for biodegradability</li><li>- Design with healthy/smart processes/materials</li></ul>                                                                                                                                                                                                    |
|                                                                                                                                                              |                                   | Design for resource conservation                                                                                                                                                                                                                                                                                            | Design for reduce resource consumption <ul style="list-style-type: none"><li>- Design for production quality control</li><li>- Design for reduction of production steps</li><li>- Design for light weighting, miniaturizing</li><li>- Design for eliminating yield losses/material/resources/parts/packaging</li><li>- Design for reducing material/resource use</li></ul> |
|                                                                                                                                                              | Design for slowing resource loops | Design for long life use of products                                                                                                                                                                                                                                                                                        | Design for reliability and durability <ul style="list-style-type: none"><li>- Design on demand or on availability</li><li>- Design the appropriate lifespan of products/components</li></ul>                                                                                                                                                                               |
|                                                                                                                                                              |                                   |                                                                                                                                                                                                                                                                                                                             | Design for product attachment and trust <ul style="list-style-type: none"><li>- Create timeless aesthetics</li><li>- Design for pleasurable experiences</li><li>- Meaningful design</li></ul>                                                                                                                                                                              |
|                                                                                                                                                              |                                   |                                                                                                                                                                                                                                                                                                                             | Design for extending product life <ul style="list-style-type: none"><li>- Design for repair/refurbishment</li><li>- Design for easy maintenance, reuse and repair</li><li>- Design for upgradability and flexibility</li></ul>                                                                                                                                             |
|                                                                                                                                                              |                                   |                                                                                                                                                                                                                                                                                                                             | Design for dematerialising products <ul style="list-style-type: none"><li>- Design for product-service systems</li><li>- Design for swapping, renting and sharing.</li></ul>                                                                                                                                                                                               |
|                                                                                                                                                              | Design for multiple cycles        | Design for resource recovery <ul style="list-style-type: none"><li>- Design for easy end-of-life cleaning, collection and transportation of recovered material/resources</li><li>- Design for cascade use</li><li>- Design for (re)manufacturing and dis-and re-assembly</li><li>- Design for upcycling/recycling</li></ul> |                                                                                                                                                                                                                                                                                                                                                                            |
|                                                                                                                                                              | Whole Systems Design              | Design for systems change                                                                                                                                                                                                                                                                                                   | Design to reduce environmental backpacks <ul style="list-style-type: none"><li>- Design for the entire value chain</li><li>- Design for local value chains</li></ul>                                                                                                                                                                                                       |
| Design for Regenerative Systems <ul style="list-style-type: none"><li>- Design for biomimicry</li><li>- Design for biological and technical cycles</li></ul> |                                   |                                                                                                                                                                                                                                                                                                                             |                                                                                                                                                                                                                                                                                                                                                                            |
| Lewandowski 2016                                                                                                                                             | Regenerate                        | Energy recovery                                                                                                                                                                                                                                                                                                             |                                                                                                                                                                                                                                                                                                                                                                            |

|                      |                                          |                                                                                        |  |
|----------------------|------------------------------------------|----------------------------------------------------------------------------------------|--|
|                      |                                          | Circular Supplies                                                                      |  |
|                      |                                          | Efficient buildings                                                                    |  |
|                      |                                          | Sustainable product locations                                                          |  |
|                      |                                          | Chemical leasing                                                                       |  |
|                      | Share                                    | Maintenance and Repair                                                                 |  |
|                      |                                          | Collaborative Consumption, Sharing Platforms, PSS: Product renting, sharing or pooling |  |
|                      |                                          | PSS: Product lease                                                                     |  |
|                      |                                          | PSS: Availability based                                                                |  |
|                      |                                          | PSS: Performance based                                                                 |  |
|                      |                                          | Incentivized return and reuse or Next Life Sales                                       |  |
|                      |                                          | Upgrading                                                                              |  |
|                      |                                          | Product Attachment and Trust                                                           |  |
|                      |                                          | Bring your own device                                                                  |  |
|                      |                                          | Hybrid model                                                                           |  |
|                      |                                          | Gap-exploiter model                                                                    |  |
|                      | Optimise                                 | Asset management                                                                       |  |
|                      |                                          | Produce on demand                                                                      |  |
|                      |                                          | Waste reduction, Good housekeeping, Lean thinking, Fit thinking                        |  |
|                      |                                          | PSS: Activity management/outsourcing                                                   |  |
|                      | Loop                                     | Remanufacture, Product Transformation                                                  |  |
|                      |                                          | Recycling, Recycling 2.0, Resource Recovery                                            |  |
|                      |                                          | Upcycling                                                                              |  |
|                      |                                          | Circular Supplies                                                                      |  |
|                      | Virtualize                               | Dematerialized services                                                                |  |
|                      | Exchange                                 | New technology                                                                         |  |
| Potting et al., 2017 | Smart product use and manufacture        | R0 - Refuse                                                                            |  |
|                      |                                          | R1 - Rethink                                                                           |  |
|                      |                                          | R2 - Reduce                                                                            |  |
|                      | Extend lifespan of product and its parts | R3 - Re-use                                                                            |  |

|                        |                                 |                                  |                                                             |
|------------------------|---------------------------------|----------------------------------|-------------------------------------------------------------|
|                        |                                 | R4 - Repair                      |                                                             |
|                        |                                 | R5 - Refurbish                   |                                                             |
|                        |                                 | R6 - Remanufacture               |                                                             |
|                        |                                 | R7 - Repurpose                   |                                                             |
|                        | Useful application of materials | R8 - Recycle                     |                                                             |
|                        |                                 | R9 - Recover                     |                                                             |
| Hollander et al., 2017 | Design for Product Integrity    | Long Use                         | Resisting Obsolescence: Design approach for long use        |
|                        |                                 |                                  | Design for Physical Durability                              |
|                        |                                 |                                  | Design for Emotional Durability                             |
|                        |                                 | Extended use                     | Postponing Obsolescence: design approaches for extended use |
|                        |                                 |                                  | Design for Maintenance                                      |
|                        |                                 |                                  | Design for Upgrading                                        |
|                        |                                 | Recovery                         | Reversing Obsolescence: design approaches for recovery      |
|                        |                                 |                                  | Design for Recontextualising                                |
|                        |                                 |                                  | Design for Repair                                           |
|                        |                                 |                                  | Design for Refurbishment                                    |
|                        |                                 |                                  | Design for remanufacturing                                  |
| Ræbild et al., 2017    | Flexibility in fit and function |                                  |                                                             |
|                        | Technical durability            |                                  |                                                             |
|                        | Logistics vs. user preferences  |                                  |                                                             |
|                        | Package range                   |                                  |                                                             |
|                        | Design for repair               |                                  |                                                             |
|                        | Design for disassembly          |                                  |                                                             |
| Bakker et al., 2018    | Design for Product Integrity    | Design Approach for Long Use     | Design for Physical Durability                              |
|                        |                                 |                                  | Design for Emotional Durability                             |
|                        |                                 | Design Approach for Extended Use | Design for Maintenance and Repair                           |
|                        |                                 |                                  | Design for Upgrading                                        |
|                        |                                 | Design approach for Recovery     | Design for Recontextualising                                |
|                        |                                 |                                  | Design for Refurbishment                                    |
|                        |                                 |                                  | Design for Remanufacturing                                  |

|                    |                        |                                                                                    |                                                                                            |
|--------------------|------------------------|------------------------------------------------------------------------------------|--------------------------------------------------------------------------------------------|
|                    |                        |                                                                                    | Design for Recycling                                                                       |
| Bovea et al., 2018 | Extension of life span | Timeless design                                                                    |                                                                                            |
|                    |                        | Adaptability                                                                       |                                                                                            |
|                    |                        | Upgradability                                                                      |                                                                                            |
|                    | Disassembly            | Connectors                                                                         | Use standardised joints                                                                    |
|                    |                        |                                                                                    | Use joints than can be disassembled rather than fixed joints                               |
|                    |                        |                                                                                    | Use screws with the same metrics                                                           |
|                    |                        |                                                                                    | Minimise type of joints                                                                    |
|                    |                        |                                                                                    | Use easily accessible joints                                                               |
|                    |                        |                                                                                    | Minimise the number of joints                                                              |
|                    |                        |                                                                                    | Minimise the number of tools to be used                                                    |
|                    |                        |                                                                                    | Use standardised tools                                                                     |
|                    |                        | Product structure                                                                  | Adopt modular designs                                                                      |
|                    |                        |                                                                                    | Minimise the number of components                                                          |
|                    |                        |                                                                                    | Be able to quickly identify disassembly joints                                             |
|                    |                        |                                                                                    | Minimise length of wires and cables                                                        |
|                    |                        |                                                                                    | Size components to make their handling easier                                              |
|                    |                        |                                                                                    | Facilitate the accessibility of essential components (for their potential reuse/recycling) |
|                    |                        |                                                                                    | Avoid the disassembly of parts in opposite directions                                      |
|                    |                        |                                                                                    | Design to make disassembly automatic                                                       |
|                    | Product reuse          | Design to avoid dirt from accumulating                                             |                                                                                            |
|                    |                        | Use materials that overcome cleaning processes                                     |                                                                                            |
|                    |                        | Minimise the use of parts that require frequent repairs/replacements               |                                                                                            |
|                    |                        | Use components with a similar life span                                            |                                                                                            |
|                    |                        | Incorporate systems to monitor failing components                                  |                                                                                            |
|                    | Components reuse       | Use standardised components                                                        |                                                                                            |
|                    |                        | Minimise variations in the appliance                                               |                                                                                            |
|                    | Material recycling     | Use materials compatible for recycling                                             |                                                                                            |
|                    |                        | Unify materials in the components joined by fixed joints                           |                                                                                            |
|                    |                        | Use materials with a low environmental impact (recyclable/low energy content/etc.) |                                                                                            |

|                       |                                       |                                    |                                                       |
|-----------------------|---------------------------------------|------------------------------------|-------------------------------------------------------|
|                       |                                       | Promote monomaterial designs       |                                                       |
|                       |                                       | Avoid using surface treatments     |                                                       |
|                       |                                       | Label materials                    |                                                       |
|                       |                                       | Minimise using hazardous materials |                                                       |
| Pieroni et al., 2018  | PSS Product-oriented                  |                                    | Product related service                               |
|                       |                                       |                                    | Product related advice                                |
|                       | PSS Use-oriented                      |                                    | Product lease                                         |
|                       |                                       |                                    | Product renting/sharing                               |
|                       |                                       |                                    | Product pooling                                       |
|                       | PSS Result-oriented                   |                                    | Pat-per-service unit                                  |
|                       |                                       |                                    | Activity management /outsourcing                      |
|                       |                                       |                                    | Functional result                                     |
|                       | Smarter product use and manufacture   | Refuse                             | Abandoning product function                           |
|                       |                                       |                                    | Same function, radically different product/technology |
|                       |                                       | Rethink                            | More intense use or product capacity                  |
|                       |                                       | Reduce                             | Raw materials and sourcing                            |
|                       |                                       |                                    | Manufacturing and logistics                           |
|                       |                                       |                                    | Product use and operation                             |
|                       | Extend lifespan or products and parts |                                    | Upgrade                                               |
|                       |                                       |                                    | Re-use                                                |
|                       |                                       |                                    | Repair and Maintenance                                |
|                       |                                       |                                    | Refurbish                                             |
|                       |                                       |                                    | Remanufacture                                         |
|                       |                                       |                                    | Repurpose                                             |
|                       | Useful application of materials       |                                    | Recycle                                               |
|                       |                                       |                                    | Recover                                               |
| Urbinati et al., 2018 | Value Network                         | Df Reused material                 |                                                       |
|                       |                                       | Df Redistribute or Reused          |                                                       |
|                       |                                       | Df Redistribute or Reused          |                                                       |
|                       |                                       | Df Repair and Maintenance          |                                                       |
|                       |                                       | Df Remanufacture                   |                                                       |



|                        |                                       |                                             |                                         |
|------------------------|---------------------------------------|---------------------------------------------|-----------------------------------------|
|                        |                                       | Df Reassembly                               |                                         |
|                        |                                       | Df Disassembly                              |                                         |
|                        |                                       | Df Recycle                                  |                                         |
|                        | Customer Value Proposition            | Df Durability                               |                                         |
|                        |                                       | Df Quality                                  |                                         |
|                        |                                       | Df Reliability                              |                                         |
|                        |                                       | Df Esthetic Longevity                       |                                         |
|                        |                                       | Df Customization                            |                                         |
|                        |                                       | Df Customer's attachment                    |                                         |
| De Mattos et al., 2018 | Industrial Symbiosis                  | Work collectively and collaboratively       |                                         |
|                        | Design of products and services       | Co-creating Ecodesign                       |                                         |
|                        | Extending the resource values         | Repurposing end-of-life                     |                                         |
|                        |                                       | Dismantle equipment and feed its own supply |                                         |
|                        | Reverse Supply Chain                  | Bringing all partners together              |                                         |
|                        | Integration of information processing | Platforms or collaborative sites            |                                         |
|                        | Traceability                          | Implementation RFID                         |                                         |
|                        |                                       | Radio-Frequency IDentification              |                                         |
| Kazancoglu et al.2018  | Environmental performance             | Decreasing Emissions                        | GreenHouse Gas Emissions                |
|                        |                                       |                                             | Air Emissions                           |
|                        |                                       |                                             | Carbon Emissions                        |
|                        |                                       | Decreasing Energy Consumption               | Energy Utilization Ratio                |
|                        |                                       |                                             | Usage of Green Fuels                    |
|                        |                                       |                                             | Less Consumption                        |
|                        |                                       |                                             | Usage of Alternative Energy Sources     |
|                        |                                       | Decreasing Business Waste                   | Solid Waste                             |
|                        |                                       |                                             | Liquid/Water Waste                      |
|                        |                                       |                                             | Total Flow Quantity of Scrap            |
|                        |                                       |                                             | Waste generated by Suppliers            |
|                        |                                       |                                             | Percent of Materials Recycled or Reused |
|                        |                                       |                                             | Total Amount of Hazardous and Toxic     |

|  |                                |                                   |                                                                                     |
|--|--------------------------------|-----------------------------------|-------------------------------------------------------------------------------------|
|  |                                |                                   | Waste                                                                               |
|  |                                |                                   | Usage of Hazardous/Harmful/Toxic Materials                                          |
|  |                                |                                   | Compliance of effluents with national and local environmental rules and regulations |
|  |                                | Decreasing Environmental Cost     | Cost of Scrap                                                                       |
|  |                                |                                   | Cost of Rework                                                                      |
|  |                                |                                   | Additional Cost for Environmentally Friendly Products and Materials                 |
|  |                                |                                   | Disposal Costs                                                                      |
|  |                                |                                   | Recycling Costs                                                                     |
|  |                                |                                   | Cost of Waste Treatment                                                             |
|  |                                |                                   | Waste Discharge Fee                                                                 |
|  |                                |                                   | Environmental Accidents Fine                                                        |
|  |                                |                                   | Cost for Energy Consumption                                                         |
|  |                                |                                   | Frequency of Environmental Accidents                                                |
|  |                                | Increasing Environmental Revenues | Revenues from Green Products                                                        |
|  |                                |                                   | Sale of Recycled Materials and Products                                             |
|  |                                |                                   | Sale of Scrap and Used Materials                                                    |
|  |                                |                                   | Sale of Excess Inventories and Materials                                            |
|  |                                |                                   | Sale of Excess Capital Equipment                                                    |
|  | Economic/financial performance | Cost Oriented                     | Warranty Cost                                                                       |
|  |                                |                                   | Transportation Cost                                                                 |
|  |                                |                                   | Labor Cost per Hour                                                                 |
|  |                                |                                   | Training and Orientation Cost                                                       |
|  |                                |                                   | Manufacturing Cost                                                                  |
|  |                                |                                   | Cost of Raw Materials                                                               |
|  |                                |                                   | Cost of Procurement                                                                 |
|  |                                | Revenue-Oriented                  | Average Profit from Green Products                                                  |
|  |                                |                                   | Profit Growth Rate for Green Products                                               |
|  |                                |                                   | Average Return on Sales from Green Products                                         |
|  |                                |                                   | Average Return on Investment from Green Products                                    |

|  |                         |                               |                                                         |
|--|-------------------------|-------------------------------|---------------------------------------------------------|
|  |                         |                               | Average Return on Net Assets from Green Products        |
|  | Operational performance | Increase in Quality           | Customer Rejection Rate                                 |
|  |                         |                               | Finished Product Yield Rate                             |
|  |                         |                               | In Plant Defect Rate                                    |
|  |                         |                               | Total Quality Environmental Management                  |
|  |                         |                               | Employee Satisfaction from Green Processes              |
|  |                         |                               | Poka-Yoke Equipment                                     |
|  |                         |                               | Continuous Improvement System                           |
|  |                         |                               | Scrap Rate                                              |
|  |                         |                               | Rework Rate                                             |
|  |                         | Increasing Efficiency         | Overhead Expense                                        |
|  |                         |                               | Operating Expense                                       |
|  |                         |                               | Capacity Utilization                                    |
|  |                         |                               | Energy Efficiency                                       |
|  |                         | Improving Green Manufacturing | Redefine Operation and Production Processes             |
|  |                         |                               | Use of Non-Toxic and Hazardless Materials in Production |
|  |                         |                               | Use of Recyclable Materials in Production               |
|  |                         |                               | Use of Recycled Materials in Production                 |
|  |                         |                               | Waste Reduction and Pollution Monitoring Equipment      |
|  |                         |                               | Structure for Easy Disassembly                          |
|  |                         |                               | Monitoring and Maintenance System                       |
|  |                         |                               | Inventory Levels                                        |
|  |                         |                               | Reduction in Operation Steps                            |
|  |                         |                               | Reduction in Number of Hazardous Production Processes   |
|  |                         |                               | Reduction in Number of Hazardous Machines               |
|  |                         |                               | Reduction of Health and Safety Risks                    |
|  |                         |                               | Green Technology Adoption                               |
|  |                         |                               | Structure for Easy Assembly                             |

|  |  |                            |                                                                                            |
|--|--|----------------------------|--------------------------------------------------------------------------------------------|
|  |  |                            | Scheduling and Input/Output Control in Production Planning and Control for Waste Reduction |
|  |  |                            | Process Design for Reducing Energy Consumption                                             |
|  |  |                            | Process Design for Minimization of Waste                                                   |
|  |  |                            | Reducing the Noise Pollution                                                               |
|  |  |                            | Use of Renewable Energy Resources                                                          |
|  |  |                            | Acquisition of Green Production Technology/ Equipment                                      |
|  |  |                            | Cooperation with Customers for Green Production                                            |
|  |  | Improving Green Packaging  | Use of Non-Toxic and Hazardless Materials in Packing                                       |
|  |  |                            | Use of Recyclable Materials in Packing                                                     |
|  |  |                            | Use of Recycled Materials in Packing                                                       |
|  |  |                            | Cooperation with Customers for Green Packaging                                             |
|  |  |                            | Cooperation with Suppliers for Green Packaging.                                            |
|  |  |                            | Use of Eco-Label on Package                                                                |
|  |  |                            | Labeling for Retrieval Purposes                                                            |
|  |  | Improving Green/Eco Design | Reduction in Energy Consumption                                                            |
|  |  |                            | Reused Materials in New Designs                                                            |
|  |  |                            | Recycled Materials in New Designs                                                          |
|  |  |                            | Reduction of Resource Consumption and Waste Generation during the Use of Product           |
|  |  |                            | Reduction of Hazardous Manufacturing Process and materials                                 |
|  |  |                            | Less Volume for Storage                                                                    |
|  |  |                            | Easy Setup for Energy Saving                                                               |
|  |  |                            | Longer Service/Product Life                                                                |
|  |  |                            | Reduction of Material Consumption                                                          |
|  |  |                            | Design for Remanufacturing                                                                 |
|  |  |                            | Concurrent Engineering                                                                     |
|  |  |                            | Cooperation with Customers for Eco-Design                                                  |
|  |  |                            | Cooperation with Suppliers for Eco-Design                                                  |

|  |                       |                             |                                                              |
|--|-----------------------|-----------------------------|--------------------------------------------------------------|
|  |                       |                             | The Number of Patents for Green Products                     |
|  |                       |                             | Life Cycle Costing                                           |
|  |                       |                             | Life Cycle Assessment                                        |
|  | Logistics performance | Improving Green Logistics   | On time delivery                                             |
|  |                       |                             | Eco-driving to decrease fuel consumption                     |
|  |                       |                             | Just in time for logistics                                   |
|  |                       |                             | Order cycle time                                             |
|  |                       |                             | Environmental friendly transportation                        |
|  |                       |                             | Recyclable or reusable packaging/containers in logistics     |
|  |                       |                             | Order fulfillment                                            |
|  |                       |                             | Delivery dependability                                       |
|  |                       |                             | Modal split (weight of goals transported by road)            |
|  |                       |                             | Average handling factor (Road tons-lifted)                   |
|  |                       |                             | Average length of haul (tons-km)                             |
|  |                       |                             | Average load on laden trip (weight/volume)                   |
|  |                       |                             | Average percentage of empty running                          |
|  |                       |                             | A recycling system for used and defective products           |
|  |                       |                             | Products with take-back policies                             |
|  |                       |                             | Mode of transport                                            |
|  |                       |                             | Greener vehicles                                             |
|  |                       |                             | Route optimization                                           |
|  |                       |                             | Vehicle utilization                                          |
|  |                       |                             | Fuel efficiency                                              |
|  |                       | Improving Reverse Logistics | Remanufacturing of materials                                 |
|  |                       |                             | Reusing and recycling of materials                           |
|  |                       |                             | Reduction of time for recycling                              |
|  |                       |                             | Incorporating third party logistics for customer cooperation |
|  |                       |                             | The number of customers cooperated for reverse logistics     |
|  |                       |                             | Design for reverse logistics                                 |

|  |                            |                                        |                                                                                |
|--|----------------------------|----------------------------------------|--------------------------------------------------------------------------------|
|  |                            | Improving Green Purchasing             | Eco labeled materials and products                                             |
|  |                            |                                        | Environmentally friendly materials                                             |
|  |                            |                                        | Supplier education                                                             |
|  |                            |                                        | Supplier support                                                               |
|  |                            |                                        | Cooperation with suppliers for green purchasing                                |
|  |                            |                                        | Understand environmental risk and responsibilities with suppliers              |
|  |                            |                                        | Environmentally-audited suppliers                                              |
|  |                            |                                        | Certified suppliers other than ISO 1400                                        |
|  |                            |                                        | ISO14000 certified suppliers                                                   |
|  |                            |                                        | Providing design specifications to suppliers with environmental requirements   |
|  |                            |                                        | Second-tier supplier environmental evaluation                                  |
|  |                            |                                        | Requiring certification of testing for green product conformance               |
|  |                            |                                        | Urging/forcing suppliers to conduct environmental actions                      |
|  | Organizational performance | Improving Green Image                  | Number of related fairs/ symposiums participated                               |
|  |                            |                                        | Reduction of environmental accidents                                           |
|  |                            |                                        | Improved employee and community health                                         |
|  |                            |                                        | Sponsoring to environmental events/collaboration with ecological organizations |
|  |                            |                                        | CSR activities on GSCM                                                         |
|  |                            | Incorporating Environmental Management | Commitment from managers                                                       |
|  |                            |                                        | Commitment from employees                                                      |
|  |                            |                                        | Green initiatives and eco-service                                              |
|  |                            |                                        | A Clear environmental policy statement                                         |
|  |                            |                                        | Cross functional teams for environmental management                            |
|  |                            |                                        | Environmental auditing                                                         |
|  |                            |                                        | Keeping the website updated on environmental issues                            |
|  |                            |                                        | Activity report on environmental management                                    |
|  |                            |                                        | Taking stakeholders' opinions and requirements into consideration              |

|  |                       |                                                    |                                                                                                                                                   |
|--|-----------------------|----------------------------------------------------|---------------------------------------------------------------------------------------------------------------------------------------------------|
|  |                       |                                                    | Business ethics and code of conduct                                                                                                               |
|  |                       |                                                    | R&D budget on green products                                                                                                                      |
|  |                       |                                                    | Compensation/incentive linked to environmental factors                                                                                            |
|  |                       |                                                    | Environmental management on accounting practices                                                                                                  |
|  |                       |                                                    | Training for workers on environmental issues                                                                                                      |
|  |                       |                                                    | Employee suggestion system on environmental issues                                                                                                |
|  |                       |                                                    | Participation in environmental programs and research projects                                                                                     |
|  |                       |                                                    | Increase the proportion of employee recommendations and proposes for improvement in quality, social and environment health and safety performance |
|  |                       | Green Information Systems                          | Monitoring the environmental information (such as toxicity, energy used water used, air pollution)                                                |
|  |                       |                                                    | Accurate and prompt information exchange between trading partners                                                                                 |
|  |                       |                                                    | Environmental information sharing with customers                                                                                                  |
|  |                       |                                                    | Environmental information sharing with suppliers                                                                                                  |
|  |                       |                                                    | Customer relationship management related with GSCM                                                                                                |
|  |                       |                                                    | Informing trading partners prior to changing environmental need                                                                                   |
|  | Marketing performance | Increasing Customer Satisfaction                   | After sales service performance                                                                                                                   |
|  |                       |                                                    | Out of stock for green products                                                                                                                   |
|  |                       |                                                    | Service response rate                                                                                                                             |
|  |                       |                                                    | Customer returns                                                                                                                                  |
|  |                       |                                                    | Customer lost rate                                                                                                                                |
|  |                       |                                                    | Number of customers retained                                                                                                                      |
|  |                       |                                                    | Number of recalls                                                                                                                                 |
|  |                       | Improving Cooperation/Collaboration with Customers | Sharing common goals with customers                                                                                                               |
|  |                       |                                                    | Resolve environmental problems with customers                                                                                                     |
|  |                       |                                                    | Understand environmental risk and responsibilities with customers                                                                                 |
|  |                       |                                                    | Cooperation with customers to decrease environmental impact of operations                                                                         |
|  |                       |                                                    | Communicating firm's strategic needs to customers                                                                                                 |

|                      |                         |                                                                                                                                                                                                                                                  |                                                                                                                                                                        |
|----------------------|-------------------------|--------------------------------------------------------------------------------------------------------------------------------------------------------------------------------------------------------------------------------------------------|------------------------------------------------------------------------------------------------------------------------------------------------------------------------|
|                      |                         |                                                                                                                                                                                                                                                  | Cooperation with customers to encourage green purchasing behavior                                                                                                      |
|                      |                         | Marketing Measures                                                                                                                                                                                                                               | Conservation of energy and resources in marketing mix                                                                                                                  |
|                      |                         |                                                                                                                                                                                                                                                  | Use of environmental arguments in marketing                                                                                                                            |
|                      |                         |                                                                                                                                                                                                                                                  | Customer profitability on green products                                                                                                                               |
|                      |                         |                                                                                                                                                                                                                                                  | Number of green products                                                                                                                                               |
|                      |                         |                                                                                                                                                                                                                                                  | Number of new customers on green products                                                                                                                              |
|                      |                         |                                                                                                                                                                                                                                                  | Customer complain rates on green products                                                                                                                              |
|                      |                         |                                                                                                                                                                                                                                                  | Average market share growth on green products                                                                                                                          |
|                      |                         |                                                                                                                                                                                                                                                  | Average sales growth (volume and dollar) on green products                                                                                                             |
|                      |                         |                                                                                                                                                                                                                                                  | Increasing customer value on green products                                                                                                                            |
|                      |                         |                                                                                                                                                                                                                                                  | Budget on green marketing activities                                                                                                                                   |
| Blomsma et al., 2019 | Reinvent (Refuse)       |                                                                                                                                                                                                                                                  |                                                                                                                                                                        |
|                      | Rethink & reconfigure   | Multi-flow offering – cascade materials, parts & products                                                                                                                                                                                        |                                                                                                                                                                        |
|                      |                         | Long life products – through- life support                                                                                                                                                                                                       |                                                                                                                                                                        |
|                      |                         | Access or availability – incl. shared use                                                                                                                                                                                                        |                                                                                                                                                                        |
|                      |                         | Result & performance – service, not product                                                                                                                                                                                                      |                                                                                                                                                                        |
|                      | Restore, reduce & avoid | Raw materials & sourcing - Improve circularity potential and efficiency in the sourcing process (Mestre and Cooper, 2017)                                                                                                                        | Sourcing of renewables                                                                                                                                                 |
|                      |                         |                                                                                                                                                                                                                                                  | Sourcing of recyclable materials                                                                                                                                       |
|                      |                         |                                                                                                                                                                                                                                                  | Secondary sources (recycled materials, Industrial Symbiosis, other cascades).                                                                                          |
|                      |                         |                                                                                                                                                                                                                                                  | Restorative sourcing (Use former 'wastes' as input: Landfill re-mining or using ocean plastics)                                                                        |
|                      |                         |                                                                                                                                                                                                                                                  | Use of non-toxic or benign materials (to facilitate re-absorption in natural cycles)                                                                                   |
|                      |                         |                                                                                                                                                                                                                                                  | Use the lowest suitable grade of materials suitable (Reserve the highest-quality resources for the most demanding task, and use used resources further down the chain) |
|                      |                         | Manufacturing - Improve circularity potential and process efficiency in product manufacture through consuming fewer natural resources or energy, aim for 'gentani' (the absolute minimum input required to run a process) (Potting et al., 2017) | Lean manufacturing & cleaner production (use less energy and materials, treat wastes, etc)                                                                             |
|                      |                         |                                                                                                                                                                                                                                                  | Rework (pre-user refurbishment or remanufacture)                                                                                                                       |
|                      |                         |                                                                                                                                                                                                                                                  | Recycle (pre-user recycling)                                                                                                                                           |



|  |                                |                                                                                                                                                                                                                                                                                                                    |                                                                                                                                                                                            |
|--|--------------------------------|--------------------------------------------------------------------------------------------------------------------------------------------------------------------------------------------------------------------------------------------------------------------------------------------------------------------|--------------------------------------------------------------------------------------------------------------------------------------------------------------------------------------------|
|  |                                |                                                                                                                                                                                                                                                                                                                    | Cascade (find uses for manufacturing waste: internally/ at other facilities (Industrial Symbiosis))                                                                                        |
|  |                                |                                                                                                                                                                                                                                                                                                                    | Recover (energy recovery, or recovery of biological nutrients)                                                                                                                             |
|  |                                | Product use & operation - Improve circularity potential and efficiency in product use and operation through wiser use and operation of products (usually enabled by digital technologies), and aim for 'gentani' (the absolute minimum input required to run a process) (Potting et al., 2017; Reike et al., 2018) | Enable product longevity through high product integrity and robustness                                                                                                                     |
|  |                                |                                                                                                                                                                                                                                                                                                                    | Use idle product capacity (historical usage data can be used for improvements such as better scheduling (of downtime), and (give insight into the possibilities for) pooled or shared use) |
|  |                                |                                                                                                                                                                                                                                                                                                                    | Low consumables of energy, water and materials during product use and operation                                                                                                            |
|  |                                | Logistics - Improve process efficiency in logistics operations, aim for 'gentani' (minimum input into a process (Greenbiz, 2014))                                                                                                                                                                                  | Combine forward & return logistics.                                                                                                                                                        |
|  |                                |                                                                                                                                                                                                                                                                                                                    | Incentivize eco-friendly driving and transport                                                                                                                                             |
|  |                                |                                                                                                                                                                                                                                                                                                                    | Minimize, reuse or recycle (transit) packaging                                                                                                                                             |
|  |                                | Energy - Improve energy efficiency and use clean(er) sources of energy (Cullen, 2017; Mestre and Cooper, 2017).                                                                                                                                                                                                    | Use less energy                                                                                                                                                                            |
|  |                                |                                                                                                                                                                                                                                                                                                                    | Renewable energy                                                                                                                                                                           |
|  | Recirculate (Parts & products) | Upgrade                                                                                                                                                                                                                                                                                                            | Aesthetic upgrades (i.e. changing the coat or sleeve of a product due to a new preference)                                                                                                 |
|  |                                |                                                                                                                                                                                                                                                                                                                    | Functional upgrades (i.e. software upgrades, hardware upgrades)                                                                                                                            |
|  |                                | Repair & maintenance                                                                                                                                                                                                                                                                                               | Providing a product with a service, which may involve the lubrication of critical parts, checking fasteners, the tension of chains and cables, the replacement of worn-out parts, etc      |
|  |                                |                                                                                                                                                                                                                                                                                                                    | Repair may involve the restoration or replacement of faulty parts and components.                                                                                                          |
|  |                                | Reuse                                                                                                                                                                                                                                                                                                              | Selling used goods on platforms such as E-bay                                                                                                                                              |
|  |                                |                                                                                                                                                                                                                                                                                                                    | Return and resale of second hand goods through stores, such as Patagonia and Bergans                                                                                                       |
|  |                                |                                                                                                                                                                                                                                                                                                                    | The xStorage Home system (by Nissan and Eaton) gives old lithium-ion batteries from Nissan Leaf a second life inside of homes and businesses as backup and solar storage batteries.        |
|  |                                | Refurbish                                                                                                                                                                                                                                                                                                          |                                                                                                                                                                                            |
|  |                                | Remanufacture                                                                                                                                                                                                                                                                                                      |                                                                                                                                                                                            |
|  |                                | Repurpose                                                                                                                                                                                                                                                                                                          |                                                                                                                                                                                            |
|  | Recirculate (Materials)        | Recycle                                                                                                                                                                                                                                                                                                            |                                                                                                                                                                                            |
|  |                                | Cascade                                                                                                                                                                                                                                                                                                            |                                                                                                                                                                                            |

|                         |                                                       |                                                                                                                              |                                                                      |
|-------------------------|-------------------------------------------------------|------------------------------------------------------------------------------------------------------------------------------|----------------------------------------------------------------------|
|                         |                                                       | Recover                                                                                                                      | Incineration, pyrolysis or anaerobic digestion (recovery of energy). |
|                         |                                                       |                                                                                                                              | Composting (recovery of biological nutrients).                       |
| Suarez-Eiroa et al.2019 | Adjusting inputs to the system to regeneration rates  | Substituting non-renewable by renewable inputs (e.g., bio-based materials, renewable energy)                                 |                                                                      |
|                         |                                                       | Substituting renewable materials with low regeneration rates for other with faster regeneration rates                        |                                                                      |
|                         |                                                       | Adjusting taxes and subsidies of technology, products and materials based on their resource regeneration rates               |                                                                      |
|                         |                                                       | Saving energy and materials (i.e. improving energy efficiency, resource productivity, virtualizing products, etc.)           |                                                                      |
|                         |                                                       | Fostering renewable mobility (i.e. walking, bicycle, renewable fuels, etc.)                                                  |                                                                      |
|                         | Adjusting outputs from the system to absorption rates | Substituting materials and processes which produce technical outputs by those which produce biological outputs               |                                                                      |
|                         |                                                       | Substituting processes for those with lower waste generation rates (i.e. more eco-efficiency processes)                      |                                                                      |
|                         |                                                       | Adjusting taxes and subsidies of technology, products and materials based on their waste generation rates                    |                                                                      |
|                         | Closing the system                                    | Separating biological and technical wastes properly                                                                          |                                                                      |
|                         |                                                       | Remanufacturing products and components                                                                                      |                                                                      |
|                         |                                                       | Promoting and improving downcycling, recycling and upcycling of wastes (i.e. logistics, take-back systems, technology, etc.) |                                                                      |
|                         |                                                       | Promoting energy recovery by converting waste into heat, electricity or fuel                                                 |                                                                      |
|                         |                                                       | Promoting Extended Producer Responsibility                                                                                   |                                                                      |
|                         | Maintaining the value of resources within the system  | Interconnecting stages (i.e. redistributing second-hand goods)                                                               |                                                                      |
|                         |                                                       | Promoting industrial symbiosis (i.e. establishing standards, cascading, by-products, etc.)                                   |                                                                      |
|                         |                                                       | Increasing durability (i.e. practical guides for reparability, preventive and corrective maintenance, repurposing, etc.)     |                                                                      |
|                         |                                                       | Reducing obsolescence (i.e. updating software)                                                                               |                                                                      |
|                         | Reducing the system's size                            | Informing consumers properly (i.e. eco-labelling, product labelling, product declarations, etc.)                             |                                                                      |
|                         |                                                       | Expanding the Extended Consumer Responsibility                                                                               |                                                                      |
|                         |                                                       | Promoting functional service economy and sharing economy (i.e. collective mobility)                                          |                                                                      |

|                          |                                  |                                                                                                                               |                              |
|--------------------------|----------------------------------|-------------------------------------------------------------------------------------------------------------------------------|------------------------------|
|                          |                                  | Promoting green procurement (i.e. local products, season products, etc.)                                                      |                              |
|                          |                                  | Adjusting selling doses to consumer doses                                                                                     |                              |
|                          | Designing for CE                 | Eco-design (i.e. optimizing packaging, improving durability, etc.)                                                            |                              |
|                          |                                  | Designing transparent, reproducible and scalable products to build the same products in other places based on local resources |                              |
|                          |                                  | Thinking about practical utilities and consumer preferences (customization/made to order)                                     |                              |
|                          |                                  | Designing new business models and strategies                                                                                  |                              |
|                          |                                  | Designing new methodologies to guarantee a continual improvement                                                              |                              |
|                          |                                  | Designing projects to promote sustainable development and circular economy                                                    |                              |
|                          |                                  |                                                                                                                               |                              |
|                          | Educating for CE                 | Adjusting educational curricula to the current challenges                                                                     |                              |
|                          |                                  | Promoting knowledge, skills, capabilities and values that ensure the proper performance of circular economy                   |                              |
|                          |                                  | Promoting habits and individual actions in favor of circular economy                                                          |                              |
| Kristensen et al., 2020  | Recycling                        |                                                                                                                               |                              |
|                          | Remanufacturing                  |                                                                                                                               |                              |
|                          | Reuse                            |                                                                                                                               |                              |
|                          | Resource Efficiency              |                                                                                                                               |                              |
|                          | Disassembly                      |                                                                                                                               |                              |
|                          | Lifetime extension               |                                                                                                                               |                              |
|                          | Waste management                 |                                                                                                                               |                              |
|                          | End-of-life management           |                                                                                                                               |                              |
|                          | Multidimensional indicators      |                                                                                                                               |                              |
| Fernandes Aguiar et al., |                                  | Design for Dematerializing/ repurposing products                                                                              | Design for PSSs              |
|                          |                                  |                                                                                                                               | Design for Exchange          |
|                          |                                  |                                                                                                                               | Design for Adaptability      |
|                          |                                  |                                                                                                                               | Design for Repurpose         |
|                          |                                  |                                                                                                                               | Design for Remake            |
|                          |                                  |                                                                                                                               | Design for Recontextualizing |
|                          | Design for Resource Conservation | Design for reduce resource consumption                                                                                        | Design for Product Quality   |

|                     |                          |                                                      |                                                                   |
|---------------------|--------------------------|------------------------------------------------------|-------------------------------------------------------------------|
|                     |                          |                                                      | Design for Reliability                                            |
|                     |                          |                                                      | Design for reduce Weight/minimization                             |
|                     |                          |                                                      | Design for Fault diagnosis and failure modes                      |
|                     |                          |                                                      | Design for Energy Efficiency                                      |
|                     |                          |                                                      | Design for Environment                                            |
|                     |                          |                                                      | Design for Sustainability                                         |
|                     |                          |                                                      | Design for Modularity                                             |
|                     |                          |                                                      | Design for Standardization and compatibility                      |
|                     |                          |                                                      | Design for Reduce                                                 |
|                     |                          |                                                      | Design for Demand or on Availability                              |
|                     |                          | Design for Closing Resource Loops                    | Design for Biodegradability                                       |
|                     | Design for System Change | Design for Regenerative System                       | Design for Biomimicry                                             |
|                     |                          |                                                      | Design for Biological Cycle                                       |
|                     |                          |                                                      | Design for Technical/Technological Cycle                          |
|                     |                          |                                                      | Design for Entire Value Chain (circular supply)                   |
| Moreno et al., 2017 | Resource Conservation    | Design for energy conservation                       | Use clean energy consumption                                      |
|                     |                          |                                                      | Reduce energy consumption in manufacture (eliminate yield losses) |
|                     |                          |                                                      | Improve manufacture (production steps, supply chain)              |
|                     |                          |                                                      | Use processes suitable for low scale production                   |
|                     |                          | Design for material conservation and eliminate waste | Select the best materials (non-toxic, pure if possible)           |
|                     |                          |                                                      | Choose local materials (no-rare to avoid scarcity)                |
|                     |                          |                                                      | Choose local materials (no-rare to avoid scarcity)                |
|                     |                          |                                                      | Eliminate unnecessary parts and sub-assemblies                    |
|                     |                          |                                                      | Reduce material (light weighting)                                 |
|                     |                          |                                                      | Reduce or eliminate packaging                                     |
|                     |                          |                                                      | Reduce the size of components (miniaturise)                       |
|                     |                          |                                                      | Reduce the size of components (miniaturise)                       |
|                     |                          |                                                      | Avoid toxic adhesives, use                                        |

|  |                           |                                           |                                                                                      |
|--|---------------------------|-------------------------------------------|--------------------------------------------------------------------------------------|
|  |                           |                                           | easy-mechanic joints (fasteners, visible joints)                                     |
|  |                           |                                           | Use pure materials to allow biodegradability                                         |
|  | Life Cycles (end-of-life) | Design for optimising/extend product life | Assure reliability (quality)                                                         |
|  |                           |                                           | Allow reusabilit                                                                     |
|  |                           |                                           | Encourage maintenance (repair/refurbish)                                             |
|  |                           |                                           | Ease assembly/disassembl                                                             |
|  |                           |                                           | Standardise parts for compatibility (modularity)                                     |
|  |                           |                                           | Remanufacture                                                                        |
|  |                           | Design for multiple life cycles           | Recover material (easy to clean, collect and transport)                              |
|  |                           |                                           | Allow cascade use                                                                    |
|  |                           |                                           | Motivate the user to recycle                                                         |
|  |                           |                                           | Assure spare parts availability                                                      |
|  | Whole System Design       | Design for sustainability                 | Shift the ownership of products into a service (swap, rent, share)                   |
|  |                           |                                           | De-materialise products into digital platforms                                       |
|  |                           |                                           | De-materialise products into digital platforms                                       |
|  |                           |                                           | Strengthen local industry                                                            |
|  |                           |                                           | Create regenerative systems (biomimicry)                                             |
|  |                           |                                           | Care about social impact                                                             |
|  |                           |                                           | Create a wealth through a good business practice (improve cost-benefit relationship) |
|  |                           |                                           | Develop a trace-and-return system                                                    |
|  | Customer                  | Design for users                          | Customise to wants and needs of each person                                          |
|  |                           |                                           | Enhance durability (avoid built-in obsolescence)                                     |
|  |                           |                                           | Develop attachment/loyalty (experience, meaningful design)                           |
|  |                           |                                           | Reduce waiting times in delivery to consumer                                         |
|  |                           |                                           | Based on long-lasting trends, no ephemeral fashion (timeless aesthetics)             |
|  |                           |                                           | Implement poka-yoke principles to ease use                                           |
|  | Development               | Design for the present towards the future | Use mobile technologies                                                              |

|  |  |  |                                                                           |
|--|--|--|---------------------------------------------------------------------------|
|  |  |  | Use Machine-to-Machine communications (M2M)                               |
|  |  |  | Use cloud computing                                                       |
|  |  |  | Use social media technology                                               |
|  |  |  | Use big data analysis                                                     |
|  |  |  | Use new material (intelligent, organic)                                   |
|  |  |  | Use 3D printing (avoid subtracting technologies)                          |
|  |  |  | Create multi-functional teams to consider different aspects in the design |

**Table S2. Classification of design strategies according to product life cycle phases in literature.**

This table classifies how authors organise design strategies according to their respective life cycle phases. "Life Cycle Phases" defined how the authors referred to the various phases of the supply chain, while "Strategy X<sup>1</sup>" and "Strategy X<sup>2</sup>" described primary and secondary design strategies for each phase.

| Authors           | Life Cycle Phase         | Strategy X1                           | Strategy X2                          |
|-------------------|--------------------------|---------------------------------------|--------------------------------------|
| Brezet et al 1998 | New concept development  | Dematerialisation                     |                                      |
|                   |                          | Shared use of product                 |                                      |
|                   |                          | Integration of functions              |                                      |
|                   |                          | Functional optimisation of product    |                                      |
|                   | Product Component Level  | Selection of low-impact materials     | Cleaner materials                    |
|                   |                          |                                       | Renewable materials                  |
|                   |                          |                                       | Lower energy content materials       |
|                   |                          |                                       | Recycled materials                   |
|                   |                          |                                       | Recyclable materials                 |
|                   |                          | Reduction of materials usage          | Reduction in weight                  |
|                   |                          |                                       | Reduction in (transport) volume      |
|                   | Product Structural level | Optimisation of production techniques | Alternative production techniques    |
|                   |                          |                                       | Fewer production steps               |
|                   |                          |                                       | Lower/cleaner energy consumption     |
|                   |                          |                                       | Less production waste                |
|                   |                          |                                       | Fewer/cleaner production consumables |
|                   |                          | Optimisation of distribution system   | Less/ cleaner/ reusable packaging    |
|                   |                          |                                       | Energy-efficient transportation mode |
|                   |                          |                                       | Energy-efficient logistics           |
|                   |                          | Reduction of impact during use        | Lower energy consumption             |
|                   |                          |                                       | Cleaner energy source                |
|                   |                          |                                       | Fewer consumables needed             |
|                   |                          |                                       | Cleaner consumables                  |
|                   |                          |                                       | No waste of energy/consumables       |
|                   | Product System Level     | Optimization of initial lifetime      | Reliability and durability           |
|                   |                          |                                       | Easier maintenance and repair        |
|                   |                          |                                       | Modular product structure            |
|                   |                          |                                       | Classic design                       |
|                   |                          |                                       | Strong product-user relation         |
|                   |                          | Optimization of end-of-life system    | Reuse of product                     |

|                    |                             |                                                        |                           |
|--------------------|-----------------------------|--------------------------------------------------------|---------------------------|
|                    |                             |                                                        | Remanufacturing/refurbish |
|                    |                             |                                                        | Recycling or materials    |
|                    |                             |                                                        | Safer incineration        |
| Umeda et al., 2012 | Pre-manufacture             | Use of recycled Materials                              |                           |
|                    |                             | Use of less energy intense materials                   |                           |
|                    |                             | Environmentally conscious component selection          |                           |
|                    |                             | Use of renewable materials                             |                           |
|                    | Manufacture                 | Use high-throughput process                            |                           |
|                    |                             | Use material saving process                            |                           |
|                    |                             | Overhead reduction                                     |                           |
|                    | Transportation/distribution | Improve Logistics                                      |                           |
|                    |                             | Low volume/weight                                      |                           |
|                    |                             | Use recycled materials for packaging                   |                           |
|                    | Use                         | Low energy consumption                                 |                           |
|                    |                             | Design for Maintenance/long life                       |                           |
|                    | Disposal                    | Design for Disassembly                                 |                           |
|                    |                             | Material Quality Preservation                          |                           |
| White et al., 2013 | Innovation                  | Rethink how to provide the benefit                     |                           |
|                    |                             | Design flexibility for technological change            |                           |
|                    |                             | Provide product as service                             |                           |
|                    |                             | Serve needs provided by associated products            |                           |
|                    |                             | Share among multiple users                             |                           |
|                    |                             | Design for mimetic biological systems                  |                           |
|                    |                             | Use living organisms in product system                 |                           |
|                    |                             | Create opportunity for local supply chain              |                           |
|                    | Reduced Material Impacts    | Avoid Materials that damage human or ecological health |                           |
|                    |                             | Avoid materials that deplete natural resources         |                           |
|                    |                             | Minimize quantity of materials                         |                           |
|                    |                             | Use recycled or reclaimed materials                    |                           |
|                    |                             | Use renewable resources                                |                           |
|                    |                             | Use materials from reliable certifiers                 |                           |
|                    |                             | Use waste byproducts                                   |                           |
|                    | Manufacturing Innovation    | Minimize manufacturing waste                           |                           |
|                    |                             | Design for product quality control                     |                           |



|                |                                 |                                                 |  |
|----------------|---------------------------------|-------------------------------------------------|--|
|                |                                 | Minimize Energy use in Production               |  |
|                |                                 | Use carbon neutral or renewable energy sources  |  |
|                |                                 | Minimize number of production steps             |  |
|                |                                 | Minimize number of components/ materials        |  |
|                |                                 | Sick to eliminating toxic emissions             |  |
|                | Reduced Distribution impacts    | Reduced product and packaging weight            |  |
|                |                                 | Reduced product and packaging volume            |  |
|                |                                 | Develop reusable packaging systems              |  |
|                |                                 | Use lowest- impact transport system             |  |
|                |                                 | Source or use local materials and production    |  |
|                | Reduce Behaviour and use impact | Design to encourage low-consumption behaviour   |  |
|                |                                 | Reduced energy during use                       |  |
|                |                                 | Reduced Material consumption during use         |  |
|                |                                 | Seek to eliminate toxic emissions during use    |  |
|                |                                 | Design for carbon-neutral or renewable energy   |  |
|                | System longevity                | Design for durability                           |  |
|                |                                 | Foster emotional connection to product          |  |
|                |                                 | Design for maintenance and easy repair          |  |
|                |                                 | Design for reuse and exchange of products       |  |
|                |                                 | Create timeless athletic appeal                 |  |
|                | Transitional System             | Design upgradable product                       |  |
|                |                                 | Design for second life with different function  |  |
|                |                                 | Design for reuse of components                  |  |
|                | Optimize End-of-Life            | Design for Fast Manual or automated disassembly |  |
|                |                                 | Design recycling business model                 |  |
|                |                                 | Use recyclable non-toxic materials              |  |
|                |                                 | Provide ability to biodegrade                   |  |
|                |                                 | Integrated methods for used product collection  |  |
|                |                                 | Design for safe disposal                        |  |
| Go et al. 2015 | Product Design Considerations   | Environmental performance measurements          |  |
|                |                                 | All cost considerations                         |  |
|                |                                 | Resource minimization and elimination           |  |
|                | Packaging Design                | Resource minimization and elimination           |  |

|                      |                                                         |                                            |                                          |
|----------------------|---------------------------------------------------------|--------------------------------------------|------------------------------------------|
|                      | Considerations                                          | Biodegradability                           |                                          |
|                      |                                                         | Reusability                                |                                          |
|                      |                                                         | Recyclability                              |                                          |
|                      |                                                         | Application of industry standards          |                                          |
|                      | Product Manufacturing Design Considerations             | Choosing cleaner production processes      |                                          |
|                      |                                                         | Improving quality                          |                                          |
|                      |                                                         | Choosing clean power sources               |                                          |
|                      | Material Design Considerations                          | Material selection                         | Choosing of abundant renewable resources |
|                      |                                                         |                                            | Choosing sustainably harvested materials |
|                      |                                                         |                                            | Choosing recyclable materials            |
|                      |                                                         |                                            | Avoiding hazardous substances            |
|                      |                                                         |                                            | Reducing material process energy         |
|                      |                                                         | Material employment                        | Elimination of material waste            |
|                      |                                                         |                                            | Dematerialisation                        |
|                      |                                                         |                                            | Simplification of products               |
|                      |                                                         | Product Distribution Design Considerations | Choosing cleaner transportation methods  |
|                      | Reducing transportation of products                     |                                            |                                          |
|                      | The Product Use Design Considerations                   | Reducing product energy                    |                                          |
|                      |                                                         | Reducing what a product consumes           |                                          |
|                      |                                                         | Keeping products clean                     |                                          |
|                      | The Product Service Design Considerations               | Make service easy                          |                                          |
|                      |                                                         | Use Benign servicing consumables           |                                          |
|                      | Product EOL Design Considerations                       | Design for Disassembly                     |                                          |
|                      |                                                         | Design for Recycling                       |                                          |
|                      |                                                         | Design for Reuse                           |                                          |
|                      |                                                         | Design for Remanufacturing                 |                                          |
|                      |                                                         | Design for Biodegradation                  |                                          |
| Mestre et. al., 2017 | Material extraction (Selection of low impact materials) | Slow the loop                              | Cleaner materials                        |
|                      |                                                         |                                            | Renewable materials                      |
|                      |                                                         |                                            | Lower energy materials                   |
|                      |                                                         |                                            | Recyclable materials                     |
|                      |                                                         |                                            | Recycled materials                       |
|                      | Processing (Reduction of the material use)              | Reduction in weight                        |                                          |
|                      |                                                         | Reduction in volume (transport)            |                                          |

|  |                                                                                 |  |                                                                |                    |
|--|---------------------------------------------------------------------------------|--|----------------------------------------------------------------|--------------------|
|  | Manufacturing (Optimisation of production techniques)                           |  | Alternative production techniques                              |                    |
|  |                                                                                 |  | Fewer production steps                                         |                    |
|  |                                                                                 |  | Lower/cleaner energy consumption                               |                    |
|  |                                                                                 |  | Less production waste                                          |                    |
|  |                                                                                 |  | Fewer/cleaner production consumables                           |                    |
|  | Transportation (Optimisation of distribution system)                            |  | Less/cleaner/reusable packaging                                |                    |
|  |                                                                                 |  | Energy-efficient transport mode                                |                    |
|  |                                                                                 |  | Energy-efficient logistics                                     |                    |
|  | Use (Reduction of impact during use)                                            |  | Lower energy consumption                                       |                    |
|  |                                                                                 |  | Cleaner energy source                                          |                    |
|  |                                                                                 |  | Cleaner consumables                                            |                    |
|  |                                                                                 |  | Fewer consumables needed                                       |                    |
|  |                                                                                 |  | No waste of energy/ consumables                                |                    |
|  | Product life extension (Optimisation of initial lifetime)                       |  | Reliability & durability                                       |                    |
|  |                                                                                 |  | Easier maintenance & repair                                    |                    |
|  |                                                                                 |  | Upgradability & adaptability                                   |                    |
|  |                                                                                 |  | Standardization & compatibility                                |                    |
|  |                                                                                 |  | Modular product structure                                      |                    |
|  |                                                                                 |  | Dis- and reassembly                                            |                    |
|  |                                                                                 |  | Classic design                                                 |                    |
|  |                                                                                 |  | Strong product-user relation (e.g. emotionally durable design) |                    |
|  | End-of-life disposal (Optimisation of end of life system)                       |  | Reuse of product                                               |                    |
|  |                                                                                 |  | Remanufacturing/ refurbishing                                  |                    |
|  |                                                                                 |  | Recycling of materials                                         |                    |
|  |                                                                                 |  | Safer incineration                                             |                    |
|  | @ – Development of new concepts / Product design review / Other design concepts |  | Dematerialisation                                              |                    |
|  |                                                                                 |  | Shared use of the product (ownership)                          |                    |
|  |                                                                                 |  | Integration of function                                        |                    |
|  |                                                                                 |  | Functional optimisation of product (components)                |                    |
|  | Material extraction (Selection of low impact materials)                         |  | Close the loop                                                 | Recycled materials |
|  |                                                                                 |  | Recyclable materials                                           |                    |
|  |                                                                                 |  | Biodegradable materials                                        |                    |
|  |                                                                                 |  | Lower energy materials                                         |                    |
|  |                                                                                 |  | Photodegradable materials                                      |                    |

|  |                                                           |  |                                                                                                   |
|--|-----------------------------------------------------------|--|---------------------------------------------------------------------------------------------------|
|  |                                                           |  | Renewable materials                                                                               |
|  |                                                           |  | Cleaner materials                                                                                 |
|  | Processing (Reduction of the material use)                |  | Reduction in weight                                                                               |
|  | Manufacturing (Optimisation of production techniques)     |  | Reduction in volume (transport)                                                                   |
|  |                                                           |  | Alternative (optimised) production techniques                                                     |
|  |                                                           |  | Fewer production steps                                                                            |
|  |                                                           |  | Lower/cleaner energy consumption                                                                  |
|  |                                                           |  | Minimal production waste                                                                          |
|  |                                                           |  | Fewer/cleaner production consumables                                                              |
|  |                                                           |  | Renewable material & energy resources                                                             |
|  |                                                           |  | Industrial symbiosis                                                                              |
|  |                                                           |  | Less/reusable/ biodegradable (zero waste) packaging                                               |
|  |                                                           |  | Energy-efficient transport mode                                                                   |
|  | Transportation (Optimisation of distribution system)      |  | Clean & efficient energy logistics                                                                |
|  |                                                           |  | Elimination of logistics– “do it yourself” (e.g. 3D print at home with starch-based polymers)     |
|  |                                                           |  | Lower energy consumption                                                                          |
|  |                                                           |  | Clean energy source                                                                               |
|  | Use (Reduction of impact during use)                      |  | Clean consumables                                                                                 |
|  |                                                           |  | Fewer consumables needed                                                                          |
|  |                                                           |  | No waste of energy/ consumables                                                                   |
|  |                                                           |  | Upgradability (modularity)                                                                        |
|  |                                                           |  | Reliability & durability b.                                                                       |
|  |                                                           |  | Easy maintenance & repair                                                                         |
|  | Product life extension (Optimisation of initial lifetime) |  | Upgradability & adaptability                                                                      |
|  |                                                           |  | Standardisation & compatibility                                                                   |
|  |                                                           |  | Modular product structure                                                                         |
|  |                                                           |  | Dis- and reassembly g.                                                                            |
|  |                                                           |  | Classic design                                                                                    |
|  |                                                           |  | Service for function maintenance (i.e. company takes back end-of-life product, replaces with new) |
|  |                                                           |  | Biodegradability                                                                                  |
|  |                                                           |  | Remanufacturing/ refurbishing                                                                     |
|  | End-of-life disposal (Optimisation of end of life system) |  | Recycling of materials                                                                            |

|                              |                                                                                 |                                                                                                                                                                                                                                                                                                                                                                                                                                                                                                       |                                                             |
|------------------------------|---------------------------------------------------------------------------------|-------------------------------------------------------------------------------------------------------------------------------------------------------------------------------------------------------------------------------------------------------------------------------------------------------------------------------------------------------------------------------------------------------------------------------------------------------------------------------------------------------|-------------------------------------------------------------|
|                              |                                                                                 |                                                                                                                                                                                                                                                                                                                                                                                                                                                                                                       | Recollection of product for dismantling/material extraction |
|                              |                                                                                 |                                                                                                                                                                                                                                                                                                                                                                                                                                                                                                       | Compostability f. Nutritional value (waste=food)            |
|                              |                                                                                 |                                                                                                                                                                                                                                                                                                                                                                                                                                                                                                       | Photodegradation h. Reuse of product                        |
|                              |                                                                                 |                                                                                                                                                                                                                                                                                                                                                                                                                                                                                                       | Repurpose of product function                               |
|                              |                                                                                 |                                                                                                                                                                                                                                                                                                                                                                                                                                                                                                       | Recollection system for product                             |
|                              | @ – Development of new concepts / Product design review / Other design concepts |                                                                                                                                                                                                                                                                                                                                                                                                                                                                                                       | Dematerialisation                                           |
|                              |                                                                                 |                                                                                                                                                                                                                                                                                                                                                                                                                                                                                                       | Shared use of product (ownership)                           |
|                              |                                                                                 |                                                                                                                                                                                                                                                                                                                                                                                                                                                                                                       | Integration of function                                     |
|                              |                                                                                 |                                                                                                                                                                                                                                                                                                                                                                                                                                                                                                       | Functional optimisation of product (components)             |
|                              |                                                                                 |                                                                                                                                                                                                                                                                                                                                                                                                                                                                                                       | Function as service (not product)                           |
|                              |                                                                                 |                                                                                                                                                                                                                                                                                                                                                                                                                                                                                                       | Circular business model                                     |
| Prieto-Sandoval et al., 2018 | Take                                                                            | Assignment: -<br><br>Systematization: Material traceability;<br>Green procurement;<br>Corporate social responsibility;<br><br>ECO2: Avoidance of the use of toxic materials. Process and product transparency;<br><br>ECO-Innovative: Embrace the use of sustainable materials;<br><br>Leading green company: Use of sustainable and fully recoverable materials;                                                                                                                                     |                                                             |
|                              | Make/transform                                                                  | Assignment: Training and of employees in sustainability issues;<br><br>Systematization: Minimizing the environmental impact by the resources optimization<br><br>ECO2: The use of sustainable energy sources Prevention of environmental damage;<br><br>ECO-Innovative: The design of circular and sustainable products;<br>Collaborative product design. Ecological modernization;<br><br>Leading green company: Zero-waste processes;<br>s Company digitalization toward industry 4.0 improvements; |                                                             |
|                              | Distribute                                                                      | Assignment: -<br><br>Systematization: -<br><br>ECO2:Optimization of stock, routes, and space;<br><br>ECO-Innovative: Local market promotion;<br><br>Leading green company: Collaborative reverse logistics                                                                                                                                                                                                                                                                                            |                                                             |
|                              | Use/consume                                                                     | Assignment: Reaction to consumer requests on environmental issues;<br><br>Systematization: Products certifications                                                                                                                                                                                                                                                                                                                                                                                    |                                                             |

|                        |                      |                                                                                                                                                                                                                                                                                                                                                   |  |
|------------------------|----------------------|---------------------------------------------------------------------------------------------------------------------------------------------------------------------------------------------------------------------------------------------------------------------------------------------------------------------------------------------------|--|
|                        |                      | <p>such as eco-labels;</p> <p>ECO2: Optimization of stock, routes, and space;<br/>Communication of environmental initiatives;</p> <p>ECO-Innovative: Green marketing strategy;<br/>Market segmentation</p> <p>Leading green company: Product system services implementation;</p>                                                                  |  |
|                        | Recover              | <p>Assignment: -</p> <p>Systematization: -</p> <p>ECO2: Waste management and in the suitable treatment of the various types of waste;</p> <p>ECO-Innovative: Valorization of waste and energy;</p> <p>Leading green company: Valorization and commercialization of by-products and surplus electrical and/or heat energy to another consumer;</p> |  |
|                        | Industrial symbiosis | <p>Assignment: -</p> <p>Systematization: -</p> <p>ECO2: -</p> <p>ECO-Innovative: Integration with other stakeholders to share materials and potential by-products;</p> <p>Leading green company: Complete integration of resources and energy with other stakeholders;</p>                                                                        |  |
| Kalmykova et al., 2018 | Material Sourcing    | Diversity and cross-sector linkages                                                                                                                                                                                                                                                                                                               |  |
|                        |                      | Energy production/Energy autonomy                                                                                                                                                                                                                                                                                                                 |  |
|                        |                      | Green procurement                                                                                                                                                                                                                                                                                                                                 |  |
|                        |                      | Life Cycle Assessment (LCA)                                                                                                                                                                                                                                                                                                                       |  |
|                        |                      | Material substitution                                                                                                                                                                                                                                                                                                                             |  |
|                        |                      | Taxation                                                                                                                                                                                                                                                                                                                                          |  |
|                        |                      | Tax credits and subsidies                                                                                                                                                                                                                                                                                                                         |  |
|                        |                      | Customization/made to order                                                                                                                                                                                                                                                                                                                       |  |
|                        |                      | Design for disassembly/recycling                                                                                                                                                                                                                                                                                                                  |  |
|                        |                      | Design for modularity                                                                                                                                                                                                                                                                                                                             |  |
|                        |                      | Eco design                                                                                                                                                                                                                                                                                                                                        |  |
|                        |                      | Reduction                                                                                                                                                                                                                                                                                                                                         |  |
|                        | Design               | Customization/made to order                                                                                                                                                                                                                                                                                                                       |  |
|                        |                      | Design for disassembly/recycling                                                                                                                                                                                                                                                                                                                  |  |
|                        |                      | Design for modularity                                                                                                                                                                                                                                                                                                                             |  |
|                        |                      | Eco design                                                                                                                                                                                                                                                                                                                                        |  |

|  |                         |                                                |  |
|--|-------------------------|------------------------------------------------|--|
|  |                         | Reduction                                      |  |
|  | Manufacturing           | Energy efficiency                              |  |
|  |                         | Material productivity                          |  |
|  |                         | Reproducible & adaptable manufacturing         |  |
|  | Distribution and Sales  | Optimized packaging design                     |  |
|  |                         | Redistribute and Resell                        |  |
|  | Consumption and Use     | Community involvement                          |  |
|  |                         | Eco-labelling                                  |  |
|  |                         | Product as a service or Product Service System |  |
|  |                         | Product labelling                              |  |
|  |                         | Re-use                                         |  |
|  |                         | Sharing                                        |  |
|  |                         | Socially responsible consumption               |  |
|  |                         | Stewardship                                    |  |
|  |                         | Virtualize                                     |  |
|  | Collection and Disposal | Extended Producer Responsibility (E.P.R)       |  |
|  |                         | Incentivized recycling                         |  |
|  |                         | Logistics/Infrastructure building              |  |
|  |                         | Separation                                     |  |
|  |                         | Take-back and trade-in systems                 |  |
|  | Recycling and Recovery  | By-products use                                |  |
|  |                         | Cascading                                      |  |
|  |                         | Downcycling                                    |  |
|  |                         | Element/substance recovery                     |  |
|  |                         | Energy recovery                                |  |
|  |                         | Extraction of bio-chemicals                    |  |
|  |                         | Functional recycling                           |  |
|  |                         | High quality recycling                         |  |
|  |                         | Industrial symbiosis                           |  |
|  |                         | Restoration                                    |  |
|  |                         | Upcycling                                      |  |
|  | Remanufacture           | Refurbishment/Remanufacture                    |  |
|  |                         | Upgrading, Maintenance and Repair              |  |
|  | Circular Inputs         | Bio-based materials                            |  |

**Table S3. Classification of design strategies according to life cycles in literature.**

This table classifies how authors organise design strategies according to their respective life cycles. “Loop X” describes the life cycle, so 1 denotes the initial loop ( $L^1$ ), whereas 2+ denotes the second loop and onwards ( $L^{2, 3, \text{etc.}}$ ). "Strategy X1" and "Strategy X2" describe the primary and secondary design strategies for each life cycle.

| Authors             | Loop X | Strategy X1                   | Strategy X2                                                                                                  |
|---------------------|--------|-------------------------------|--------------------------------------------------------------------------------------------------------------|
| Sirkin et al., 1994 | 1      | Material Selection            | Material selection and appropriate fit                                                                       |
|                     |        |                               | Material selection, relinking and resource regeneration                                                      |
|                     |        | Separability of materials     | Avoid combined materials whenever possible                                                                   |
|                     |        |                               | Use reusable connector links                                                                                 |
|                     |        |                               | Design with as few connector links as possible                                                               |
|                     |        |                               | Minimizing the number of different materials in a product eases separability                                 |
|                     |        |                               | Use modular systems, exchangeability and reduction of number of materials used.                              |
|                     |        |                               | Facilitate repair without special equipment                                                                  |
|                     |        |                               | Include material identification                                                                              |
|                     |        | Product durability            | Maximise the lifetime of the resources used (multi-usable components)                                        |
|                     |        |                               | Product reliability                                                                                          |
|                     |        |                               | Adjustment of product lifetime                                                                               |
|                     |        |                               | Use wear indicator                                                                                           |
|                     |        |                               | Use maintenance indicators                                                                                   |
|                     |        |                               | Design for repairability                                                                                     |
|                     |        |                               | Design for product renovation                                                                                |
|                     |        |                               | Design for adaptability of the product                                                                       |
|                     | 2 +    | Relinkability and cascability | Keep the next order type in mind                                                                             |
|                     |        |                               | Be informed about the existence of re-collection system for the re-use paths of chosen resources             |
|                     |        |                               | Take into consideration that by-products caused by use of the product must be relinked, neutralized or reuse |
|                     |        |                               | Prioritize designing through the use of single materials first; thereafter, compatible materials             |
|                     |        |                               | Avoid designs or process which may have toxic effects during or at the end of the product life               |



|                    |     |                                                               |                                    |
|--------------------|-----|---------------------------------------------------------------|------------------------------------|
|                    |     | Reducing resource metabolism                                  |                                    |
|                    |     | Time-sharing of products                                      |                                    |
|                    |     | Integrating similar functions                                 |                                    |
|                    |     | Separating functions                                          |                                    |
| Guiot et al., 2010 | 2+  | Critical motivations                                          | Avoidance of conventional channels |
|                    |     |                                                               | Ethical and ecological dimension   |
|                    |     |                                                               | Anti-ostentation                   |
|                    |     | Experiential motivations linked to the nature of the offering | Originality                        |
|                    |     |                                                               | Nostalgic pleasure                 |
|                    |     |                                                               | Self-expression                    |
|                    |     |                                                               | Congruence                         |
|                    |     | Experiential motivations linked to channel characteristics    | Social contact                     |
|                    |     |                                                               | Stimulation                        |
|                    |     |                                                               | Treasure hunting                   |
|                    |     | Economic motivations                                          | Wish to pay less                   |
|                    |     |                                                               | Search for fair price              |
|                    |     |                                                               | Bargain hunting                    |
|                    |     |                                                               | Gratificative role of price        |
| Daae et al., 2018  | 1   | Maintenance/longevity                                         | Control                            |
|                    |     |                                                               | Obtrusiveness                      |
|                    |     |                                                               | Encouragement                      |
|                    |     |                                                               | Meaning                            |
|                    |     |                                                               | Direction                          |
|                    |     |                                                               | Empathy                            |
|                    |     |                                                               | Importance                         |
|                    |     |                                                               | Timing                             |
|                    |     |                                                               | Exposure                           |
|                    | 2 + | Reuse                                                         | Control                            |
|                    |     |                                                               | Obtrusiveness                      |
|                    |     |                                                               | Encouragement                      |
|                    |     |                                                               | Meaning                            |
|                    |     |                                                               | Direction                          |
|                    |     |                                                               | Empathy                            |
|                    |     |                                                               | Importance                         |
|                    |     |                                                               | Timing                             |

|                           |    |                                                          |                                                                      |
|---------------------------|----|----------------------------------------------------------|----------------------------------------------------------------------|
|                           |    |                                                          | Exposure                                                             |
|                           |    | Refurbish                                                | Control                                                              |
|                           |    |                                                          | Obtrusiveness                                                        |
|                           |    |                                                          | Encouragement                                                        |
|                           |    |                                                          | Meaning                                                              |
|                           |    |                                                          | Direction                                                            |
|                           |    |                                                          | Empathy                                                              |
|                           |    |                                                          | Importance                                                           |
|                           |    |                                                          | Timing                                                               |
|                           |    |                                                          | Exposure                                                             |
|                           |    | Recycling                                                | Control                                                              |
|                           |    |                                                          | Obtrusiveness                                                        |
|                           |    |                                                          | Encouragement                                                        |
|                           |    |                                                          | Meaning                                                              |
|                           |    |                                                          | Direction                                                            |
|                           |    |                                                          | Empathy                                                              |
|                           |    |                                                          | Importance                                                           |
|                           |    |                                                          | Timing                                                               |
|                           |    |                                                          | Exposure                                                             |
| Shafiee et al., 2013      | 2+ | Second-hand                                              | Long warranty policy of a second-hand product                        |
|                           |    |                                                          | Upgrade action of a second-hand product                              |
|                           |    |                                                          | Sale price of a second-hand product                                  |
| Connor-Crabb et al., 2016 | 2+ | Seasonality                                              |                                                                      |
|                           |    | Multi-functionality / modularity                         |                                                                      |
|                           |    | Alterability / repairability                             |                                                                      |
|                           |    | Physical / emotional durability                          |                                                                      |
|                           |    | Classic design                                           |                                                                      |
|                           |    | Design inspiration                                       |                                                                      |
|                           |    | Custom sizing                                            |                                                                      |
| Weelden et al., 2016      | 2+ | Attract consumers                                        | Arouse interest to stimulate consideration of refurbished products   |
|                           |    | Convinced of the value of a refurbished                  | Demonstrate the value of refurbishment to shift risk-benefit balance |
|                           |    | Involve consumers in the use and growth of refurbishment | Use consumer power to reinforce awareness and trust building         |
| Wallner et al., 2020      | 2+ | Timeless Designs                                         | Exceptionally Beautiful Designs                                      |

|  |  |  |                           |
|--|--|--|---------------------------|
|  |  |  | Nostalgia Evoking Designs |
|  |  |  | Simplistic Design         |
