# Supplementary material for: Structuring Circular Objectives and Design Strategies for the Circular Economy: A Multi-Hierarchical Theoretical Framework
Source: MDPI journal article supplement (doi:10.3390/su14159298), 2022-07-29
Supplement: s1 [file s1]

Archive with 1 entries (1 files):
- sustainability-1726115-supplementary.pdf
